# Supplementary material for: Effect of relative humidity on the molecular composition of secondary organic aerosols from α-pinene ozonolysis
Source: Royal Society of Chemistry journal article supplement (doi:10.1039/d3ea00149k), 2024-01-01
Supplement: d3ea00149k1.pdf [file d3ea00149k1.pdf]

1 Supplement of

2 Effect of relative humidity on molecular  
3 composition of secondary organic aerosol from  $\alpha$ -  
4 pinene ozonolysis

5 Hao Luo<sup>1,2,3‡</sup>, Yindong Guo<sup>1,2‡</sup>, Hongru Shen<sup>1,2</sup>, Dan Dan Huang<sup>4</sup>, Yijun Zhang<sup>1,2,3,5,6</sup>, Defeng  
6 Zhao<sup>1,2,3,5,7\*</sup>

7 <sup>1</sup> Department of Atmospheric and Oceanic Sciences & Institute of Atmospheric Sciences,  
8 Fudan University, Shanghai, 200438, China

9 <sup>2</sup> Shanghai Frontiers Science Center of Atmosphere-Ocean Interaction, Fudan University,  
10 Shanghai, 200438, China.

11 <sup>3</sup> Shanghai Key Laboratory of Ocean-land-atmosphere Boundary Dynamics and Climate  
12 Change, Fudan University, Shanghai, 200438, China

13 <sup>4</sup> State Environmental Protection Key Laboratory of Formation and Prevention of Urban Air  
14 Pollution Complex, Shanghai Academy of Environment Sciences, Shanghai, 200233, China

15 <sup>5</sup> National Observations and Research Station for Wetland Ecosystems of the Yangtze Estuary,  
16 Fudan University, Shanghai, 200438, China

17 <sup>6</sup> Shanghai Institute of Pollution Control and Ecological Security, Shanghai, 200092, China

18 <sup>7</sup> Institute of Eco-Chongming (IEC), 20 Cuiniao Rd., Chongming, Shanghai, 202162, China.

19

20 ‡ These authors contributed equally to this work.

21

# CONTENT

22

23 The estimated equilibration timescales of vapor-particle and vapor-wall partitioning.....- 3 -

24 Figure S1-S8 .....- 4 -

25 Table S1.....10

26 Table S2.....11

27 Table S3.....15

28

29

30 THE ESTIMATED EQUILIBRATION TIMESCALES OF VAPOR-  
 31 PARTICLE AND VAPOR-WALL PARTITIONING

32 The timescale of vapor-particle partitioning ( $\tau_{v,p}$ ) refers to the partitioning of vapors directly  
 33 condensing on particles, which can be quantified as follows [Huang et al.,2016; Seinfeld and Pandis.,  
 34 2016]:

35 
$$\tau_{v,p} = (2\pi N_p \bar{D}_p \mathcal{D}_g f(Kn, \alpha_p))^{-1};$$

36 where  $N_p$  and  $\bar{D}_p$  are the total number concentration and number mean particle diameter of  
 37 suspended particle, respectively;  $\mathcal{D}_g$  means the gas-phase diffusion coefficient of a specific  
 38 organic vapor;  $Kn$  is Knudsen number, which is equal to  $2\lambda/D_p$ ;  $\alpha_p$  is vapor accommodation  
 39 coefficient on particles, and for  $\alpha$ -pinene SOA,  $\alpha_p$  ranges from 0.01-0.1 [Stanier et al., 2007; Saleh et  
 40 al., 2013; Vaden et al., 2011];  $f(Kn, \alpha_p)$  denotes the correction factor for non-continuum diffusion and  
 41 imperfect accommodation.

42 The timescale of vapor-wall equilibrium partitioning ( $\tau_{v,w}$ ) represents the partitioning between  
 43 the vapor deposited on the reactor wall and particle, which can be obtained as follows [Zhang et  
 44 al., 2015]:

45 
$$\tau_{v,w} = \frac{1}{\left(\frac{A}{V}\right) \left( \frac{\alpha_w v / 4}{1 + \pi \alpha_w \bar{v} / 8 (D_g K_e)^{1/2}} \right) \left( 1 + \frac{C^*}{C_w} \right)}$$

46 where  $A$ ,  $V$ , and  $K_e$  are the surface area, volume, and the coefficient of eddy diffusion of the  
 47 reactor, respectively;  $\bar{v}$  represents the species mean thermal speed.  $C^*$  means the mass  
 48 saturation concentration of the vapor species, and  $C_w$  represents the mass concentration of  
 49 absorbing organic material on the wall.  $\alpha_w$  means the vapor accommodation coefficient on the  
 50 reactor wall, which is related to both the mass transfer resistances at the vapor-wall interface  
 51 and in the wall layer itself. The parameter  $\alpha_w$  can be obtained according to the inverse  
 52 dependence of  $\alpha_w$  on  $C^*$ , which is similar to the treatment of vapor-particle partitioning.

53 FIGURE S1-S8

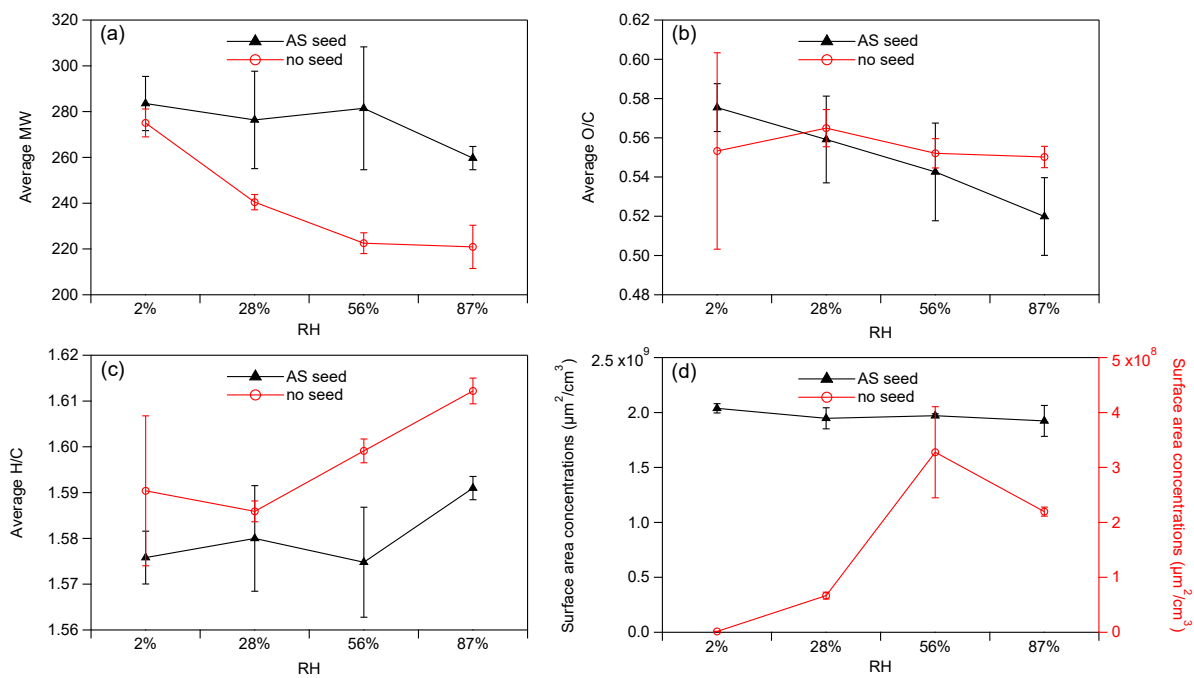

54

55 **Figure S1. The (a) average molecule weight (MW), (b) O:C, (c) H:C, and (d) surface area**  
 56 **concentrations in the absence and presence of AS seed under different RH.**

57

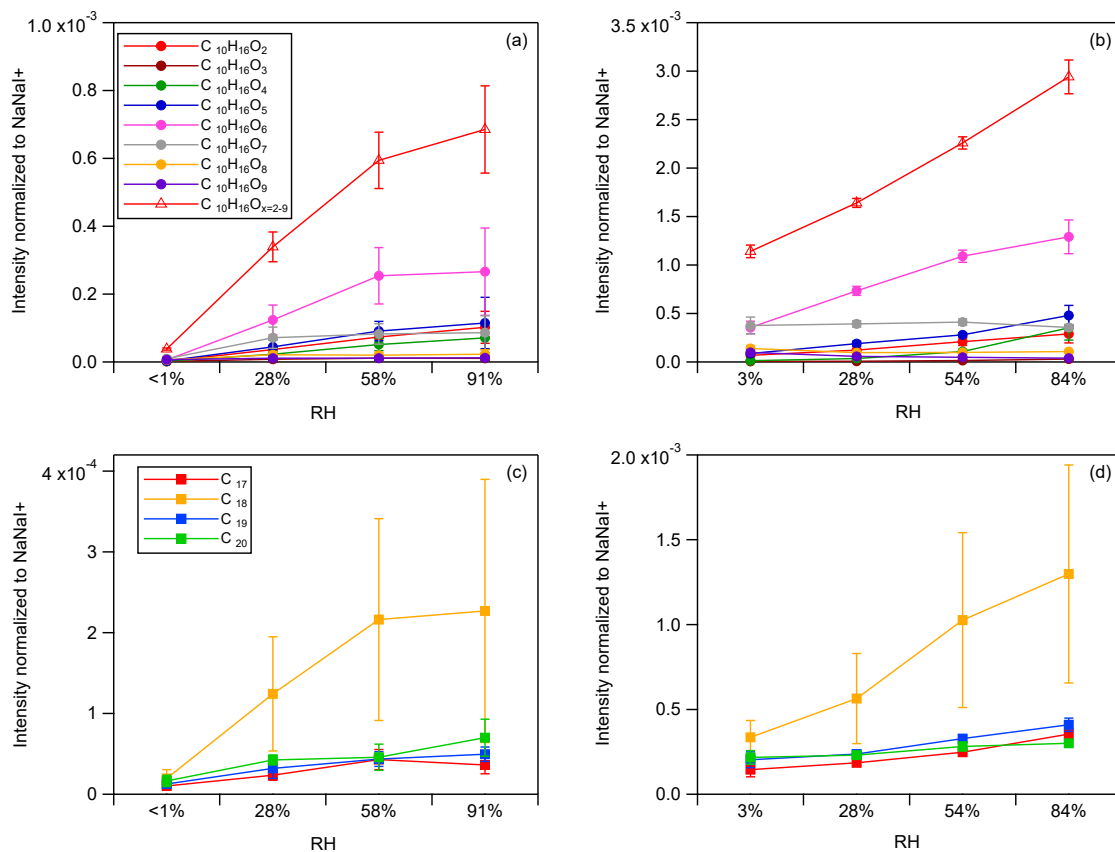

58

59 **Figure S2 The absolute abundance of monomer ( $\text{C}_{10}\text{H}_{16}\text{O}_x$ , circle) and dimers ( $\text{C}_{17-20}$ , square)**  
 60 **under RH ramp. (a)(c) without AS seed; (b)(d) with AS seed. Note that all intensity were**  
 61 **normalized to  $\text{NaNa}^+$ , which is the stable ion source signal with the top intensity.**

62

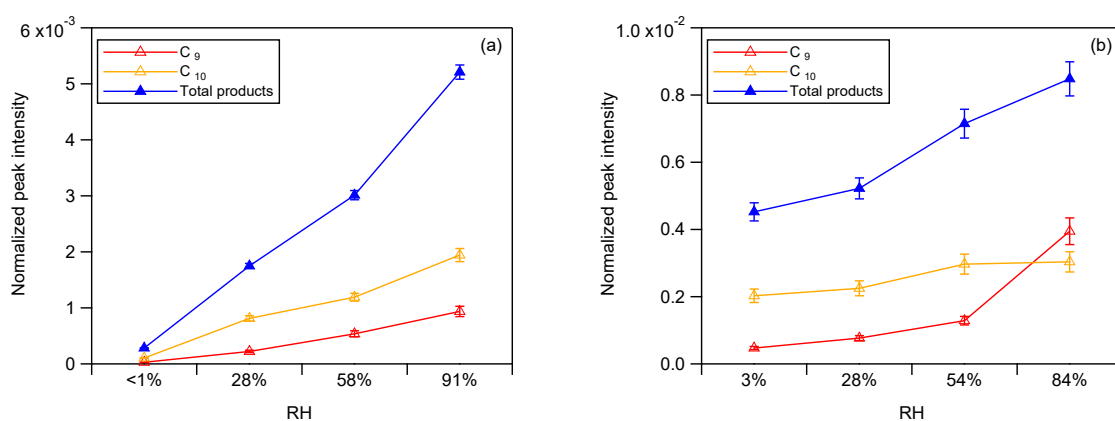

63

64 **Figure S3. The absolute abundance of total  $\text{C}_9$  and total products as a function of RH in the (a)**  
 65 **absence and (b) presence of AS seed. Note that the peak intensity in mass spectra were normalized**  
 66 **to the peak intensity of  $\text{NaNa}^+$  ( $m/z$  173), which is the most intensive peak from ion source.**

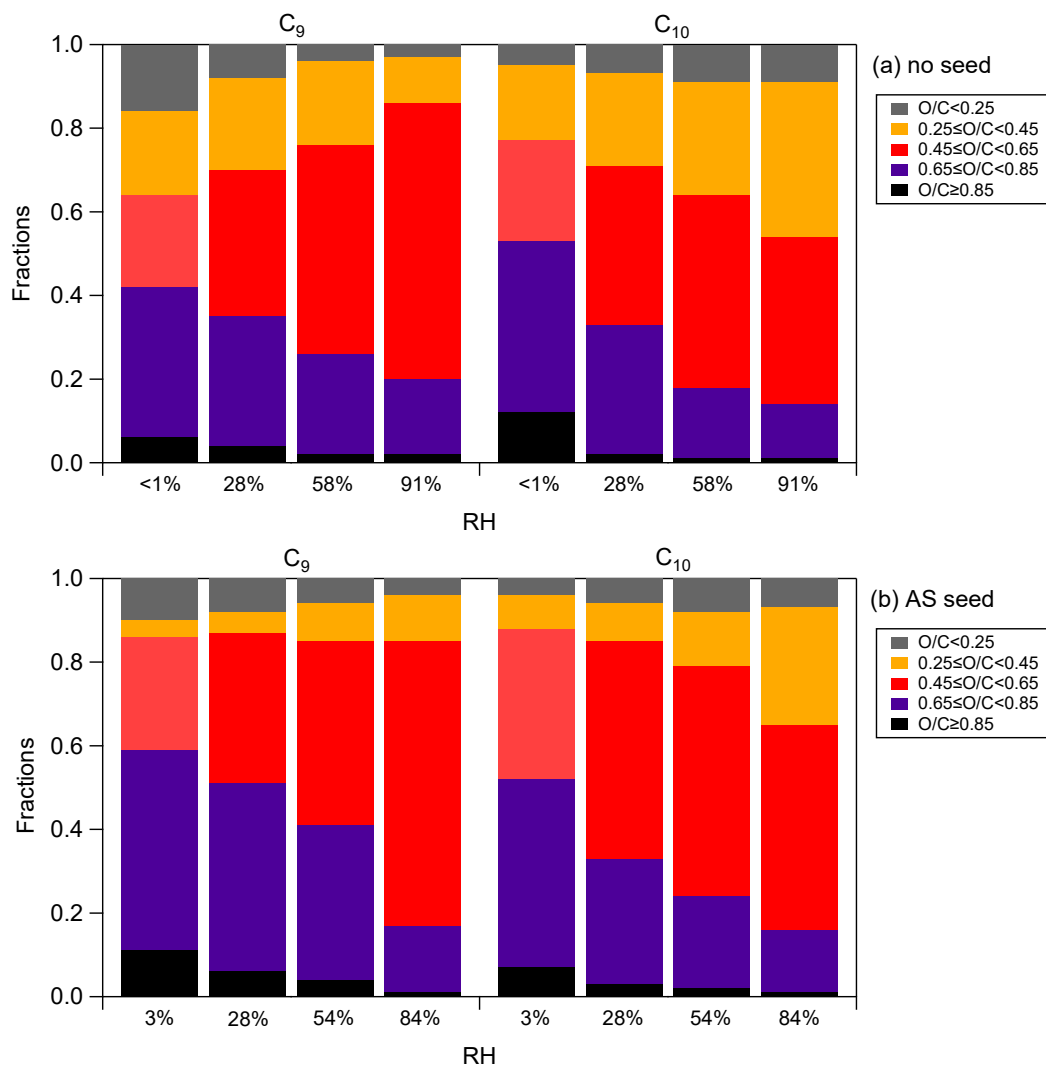

67  
68

**Figure S4. The fraction of  $C_9$  and  $C_{10}$  monomers with different O/C ratios as a function of RH**

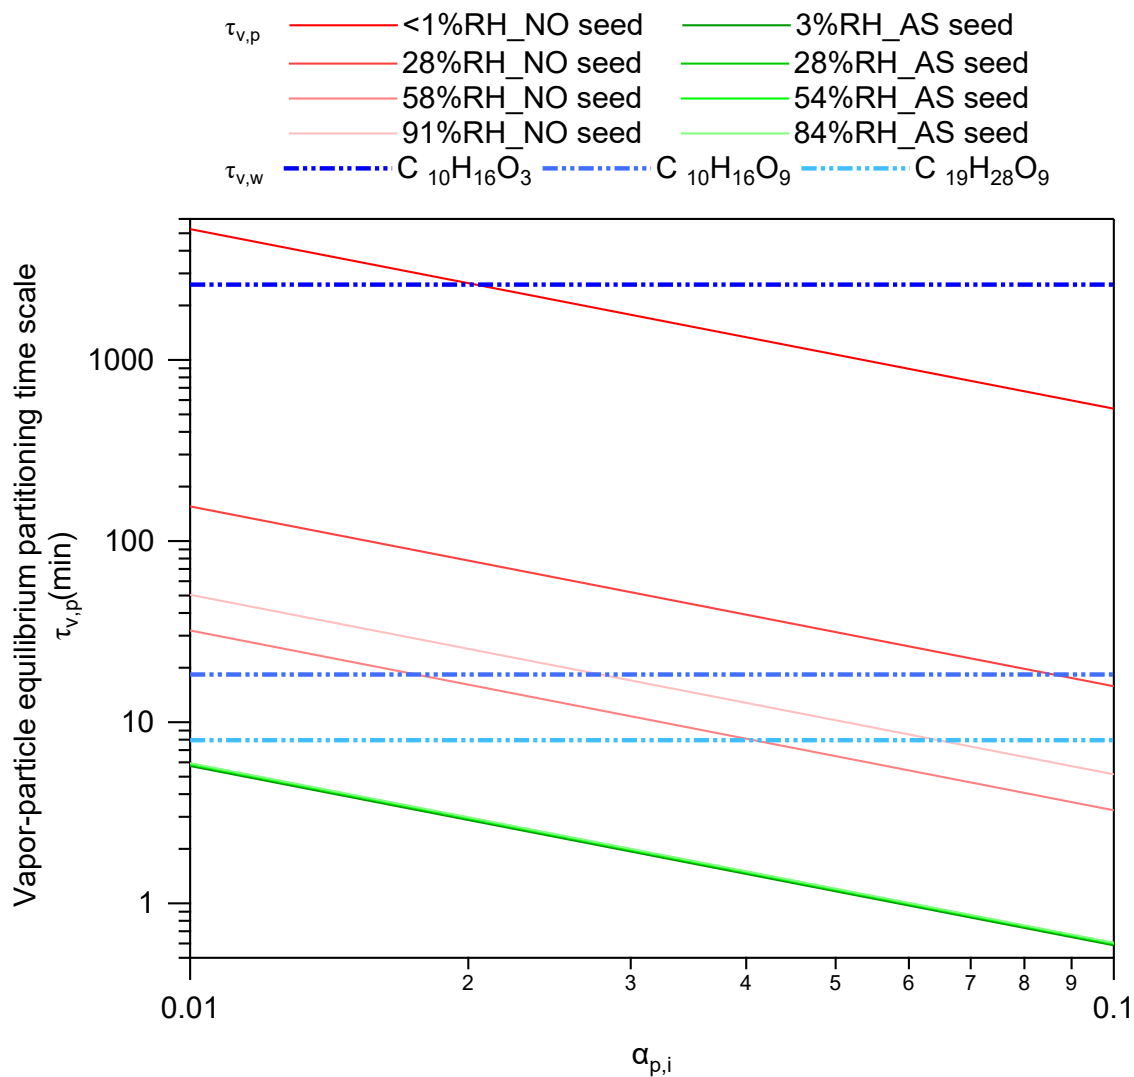

69

70 **Figure S5** The estimated vapor-particle ( $\tau_{v,p}$ ) and vapor-wall equilibration timescale ( $\tau_{v,w}$ ). Red  
 71 and green solid line represent vapor-particle equilibration time scale as function of vapor mass  
 72 accommodation coefficients on particle ( $\alpha_p$ ) in the absence and presence of AS seed conditions.  
 73 The blue dashed lines mean vapor-wall equilibration timescale of a representative SVOC  
 74 (C<sub>10</sub>H<sub>16</sub>O<sub>3</sub>, dark blue), LVOC (C<sub>10</sub>H<sub>16</sub>O<sub>9</sub>, medium blue), and ELVOC (C<sub>19</sub>H<sub>28</sub>O<sub>9</sub>, light blue).

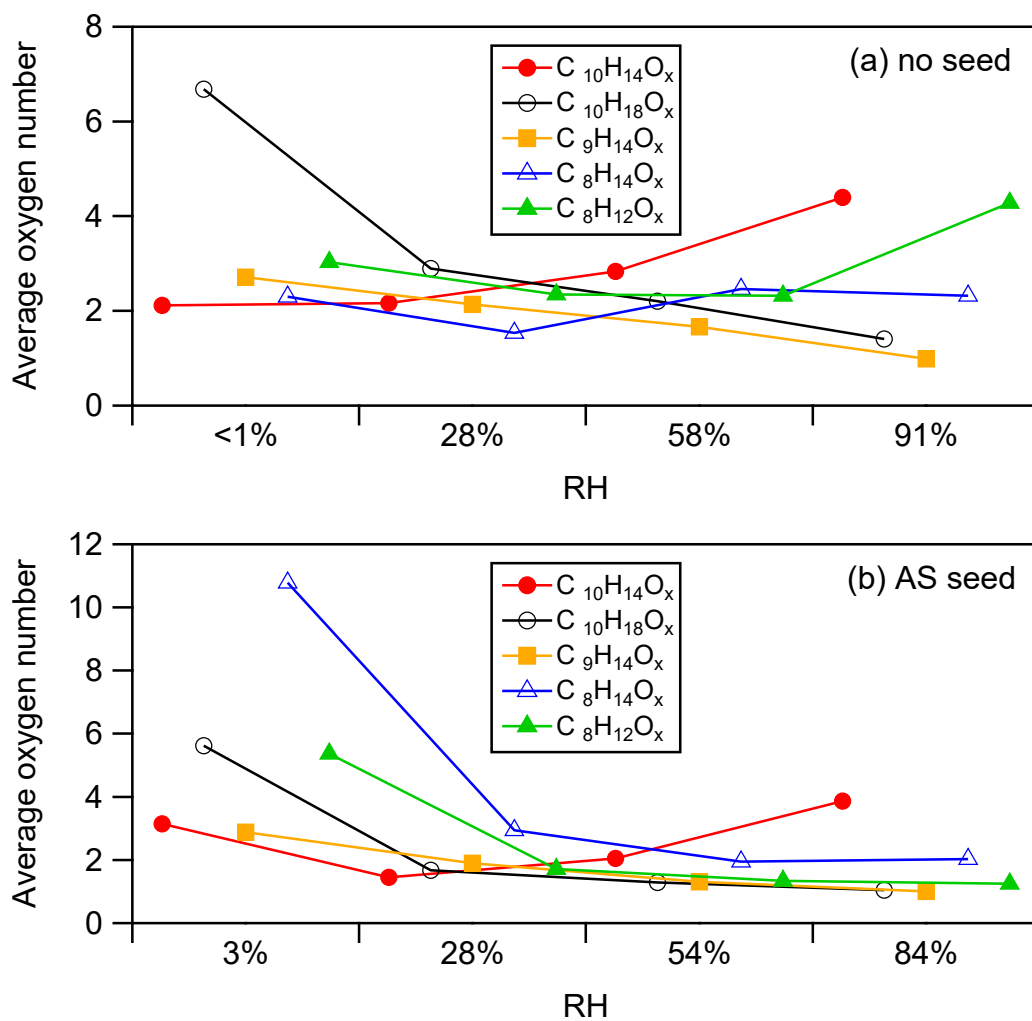

75

76 **Figure S6. The average oxygen number of monomer families under different RH in the (a)**  
 77 **absence and (b) presence of AS seed.**

78



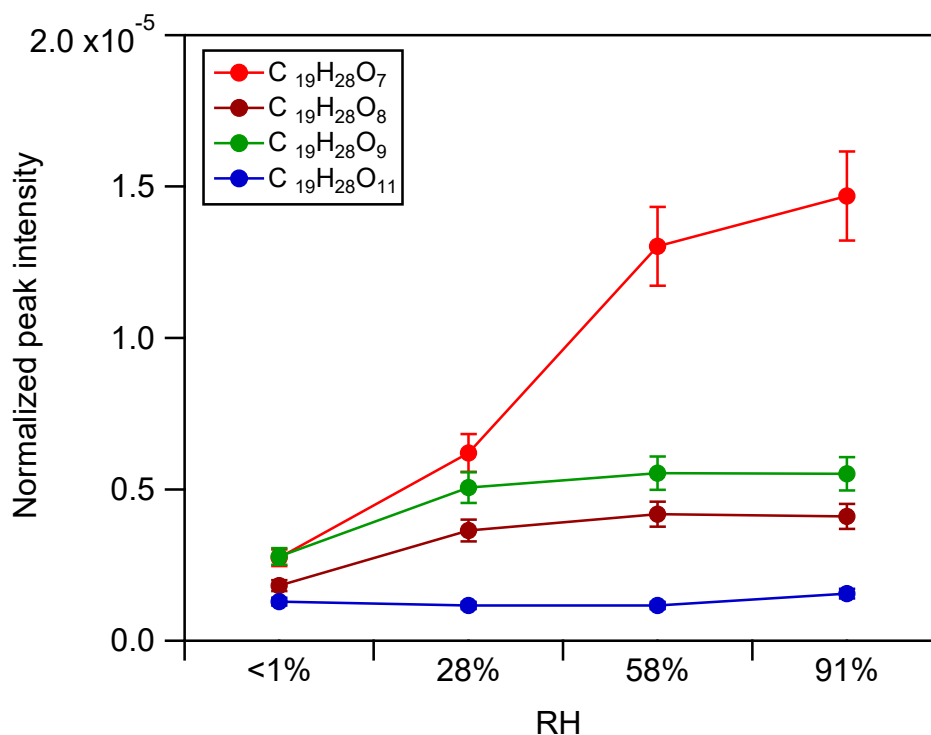

79

80 **Figure S7** The absolute abundance of C<sub>19</sub>H<sub>28</sub>O<sub>x</sub> in the absence of seed aerosol. Note that the peak  
 81 **intensity** in mass spectra were normalized to the peak intensity of NaINa<sup>+</sup> (m/z 173), which is  
 82 **the most intensive peak from ion source.**

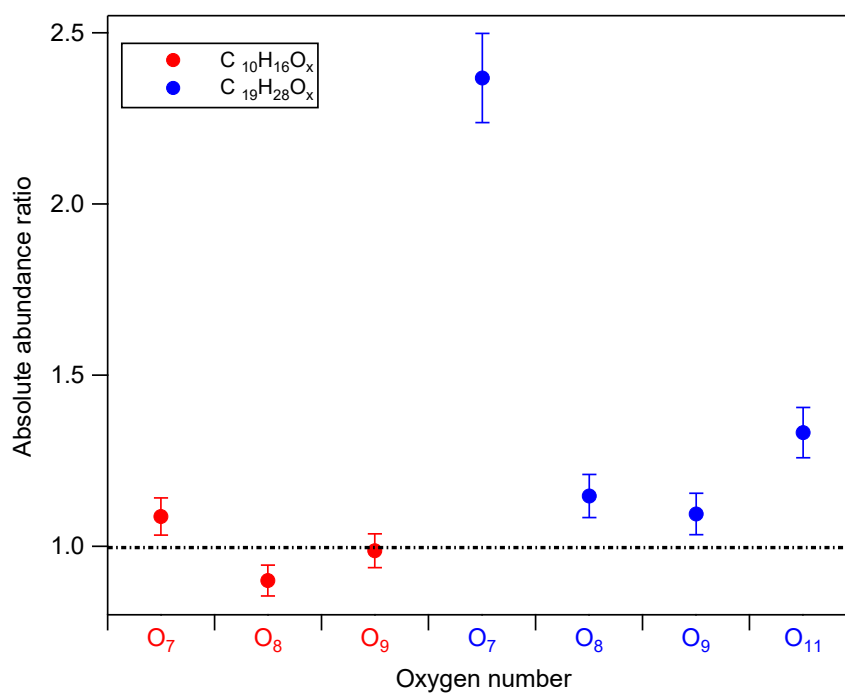

83

84 **Figure S8** The abundance ratio of C<sub>10</sub>H<sub>16</sub>O<sub>x</sub> (red) and C<sub>19</sub>H<sub>28</sub>O<sub>x</sub> (blue) at 91%RH and 28%RH in  
 85 **the absence of AS seed.**

TABLE S1

Table S1 Experimental conditions in this study

| NO. | AS seed | OH scavenger (2-propanol) | a-pinene concentrations (ppbv) | O <sub>3</sub> concentrations (ppbv) | Initial aerosol mass concentration (μg/m <sup>3</sup> ) | Residence time (min) | Volume of flow tube (L) | Temperature (K) | RH(%) |     |     |     |
|-----|---------|---------------------------|--------------------------------|--------------------------------------|---------------------------------------------------------|----------------------|-------------------------|-----------------|-------|-----|-----|-----|
|     |         |                           |                                |                                      |                                                         |                      |                         |                 | RH1   | RH2 | RH3 | RH4 |
| 1   | ×       | √                         | 161.0±9.0                      | 480.0±20.5                           | <0.05                                                   | 14.2                 | 45.9                    | 299.0           | 0     | 28  | 60  | 93  |
| 2   | ×       | √                         | 161.0±9.0                      | 480.0±20.5                           | <0.05                                                   | 15.0                 | 45.9                    | 298.0           | 0     | 28  | 57  | 90  |
| 3   | ×       | √                         | 161.0±9.0                      | 480.0±20.5                           | <0.1                                                    | 14.9                 | 45.9                    | 298.0           | 0     | 27  | 56  | 90  |
| 4   | √       | √                         | 161.0±9.0                      | 480.0±20.5                           | 43.6±5.1                                                | 14.1                 | 45.9                    | 298.0           | 3     | 27  | 53  | 81  |
| 5   | √       | √                         | 161.0±9.0                      | 480.0±20.5                           | 34.6±5.1                                                | 14.1                 | 45.9                    | 298.0           | 4     | 30  | 56  | 87  |
| 6   | √       | √                         | 161.0±9.0                      | 480.0±20.5                           | 31.5±5.1                                                | 14.1                 | 45.9                    | 298.0           | 4     | 29  | 56  | 87  |

TABLE S2

Table S2 Identification of products molecular formula

| m/Q     | molecular formula                              |
|---------|------------------------------------------------|
| 126.031 | C <sub>6</sub> H <sub>6</sub> O <sub>3</sub>   |
| 126.068 | C <sub>7</sub> H <sub>10</sub> O <sub>2</sub>  |
| 134.021 | C <sub>4</sub> H <sub>6</sub> O <sub>5</sub>   |
| 142.062 | C <sub>7</sub> H <sub>10</sub> O <sub>3</sub>  |
| 146.021 | C <sub>5</sub> H <sub>6</sub> O <sub>5</sub>   |
| 146.057 | C <sub>6</sub> H <sub>10</sub> O <sub>4</sub>  |
| 148.037 | C <sub>5</sub> H <sub>8</sub> O <sub>5</sub>   |
| 148.073 | C <sub>6</sub> H <sub>12</sub> O <sub>4</sub>  |
| 154.099 | C <sub>9</sub> H <sub>14</sub> O <sub>2</sub>  |
| 156.078 | C <sub>8</sub> H <sub>12</sub> O <sub>3</sub>  |
| 156.114 | C <sub>9</sub> H <sub>16</sub> O <sub>2</sub>  |
| 158.057 | C <sub>7</sub> H <sub>10</sub> O <sub>4</sub>  |
| 158.094 | C <sub>8</sub> H <sub>14</sub> O <sub>3</sub>  |
| 164.032 | C <sub>5</sub> H <sub>8</sub> O <sub>6</sub>   |
| 166.099 | C <sub>10</sub> H <sub>14</sub> O <sub>2</sub> |
| 168.114 | C <sub>10</sub> H <sub>16</sub> O <sub>2</sub> |
| 170.057 | C <sub>8</sub> H <sub>10</sub> O <sub>4</sub>  |
| 170.094 | C <sub>9</sub> H <sub>14</sub> O <sub>3</sub>  |
| 172.073 | C <sub>8</sub> H <sub>12</sub> O <sub>4</sub>  |
| 172.109 | C <sub>9</sub> H <sub>16</sub> O <sub>3</sub>  |
| 174.052 | C <sub>7</sub> H <sub>10</sub> O <sub>5</sub>  |
| 174.089 | C <sub>8</sub> H <sub>14</sub> O <sub>4</sub>  |
| 176.068 | C <sub>7</sub> H <sub>12</sub> O <sub>5</sub>  |
| 182.094 | C <sub>10</sub> H <sub>14</sub> O <sub>3</sub> |
| 184.073 | C <sub>9</sub> H <sub>12</sub> O <sub>4</sub>  |
| 184.109 | C <sub>10</sub> H <sub>16</sub> O <sub>3</sub> |
| 186.089 | C <sub>9</sub> H <sub>14</sub> O <sub>4</sub>  |
| 186.125 | C <sub>10</sub> H <sub>18</sub> O <sub>3</sub> |
| 188.068 | C <sub>8</sub> H <sub>12</sub> O <sub>5</sub>  |

|         |          |
|---------|----------|
| 188.104 | C9H16O4  |
| 190.084 | C8H14O5  |
| 198.089 | C10H14O4 |
| 200.068 | C9H12O5  |
| 200.104 | C10H16O4 |
| 202.084 | C9H14O5  |
| 202.12  | C10H18O4 |
| 204.063 | C8H12O6  |
| 204.099 | C9H16O5  |
| 204.136 | C10H20O4 |
| 206.078 | C8H14O6  |
| 214.084 | C10H14O5 |
| 216.099 | C10H16O5 |
| 218.078 | C9H14O6  |
| 218.115 | C10H18O5 |
| 220.058 | C8H12O7  |
| 220.094 | C9H16O6  |
| 228.063 | C10H12O6 |
| 228.099 | C11H16O5 |
| 230.078 | C10H14O6 |
| 232.094 | C10H16O6 |
| 234.073 | C9H14O7  |
| 234.11  | C10H18O6 |
| 236.053 | C8H12O8  |
| 236.089 | C9H16O7  |
| 238.068 | C8H14O8  |
| 246.073 | C10H14O7 |
| 248.089 | C10H16O7 |
| 250.068 | C9H14O8  |
| 250.105 | C10H18O7 |
| 252.048 | C8H12O9  |
| 252.084 | C9H16O8  |
| 254.063 | C8H14O9  |
| 262.068 | C10H14O8 |

|         |           |
|---------|-----------|
| 264.084 | C10H16O8  |
| 264.208 | C17H28O2  |
| 270.219 | C16H30O3  |
| 280.079 | C10H16O9  |
| 280.203 | C17H28O3  |
| 290.188 | C18H26O3  |
| 290.224 | C19H30O2  |
| 294.058 | C10H14O10 |
| 294.131 | C12H22O8  |
| 294.183 | C17H26O4  |
| 294.219 | C18H30O3  |
| 306.183 | C18H26O4  |
| 306.219 | C19H30O3  |
| 306.255 | C20H34O2  |
| 310.177 | C17H26O5  |
| 310.214 | C18H30O4  |
| 312.193 | C17H28O5  |
| 314.172 | C16H26O6  |
| 314.245 | C18H34O4  |
| 320.198 | C19H28O4  |
| 322.177 | C18H26O5  |
| 322.214 | C19H30O4  |
| 322.25  | C20H34O3  |
| 324.193 | C18H28O5  |
| 324.23  | C19H32O4  |
| 326.172 | C17H26O6  |
| 326.209 | C18H30O5  |
| 328.188 | C17H28O6  |
| 334.214 | C20H30O4  |
| 336.141 | C14H24O9  |
| 336.178 | C15H28O8  |
| 336.23  | C20H32O4  |
| 338.172 | C18H26O6  |
| 338.209 | C19H30O5  |

|         |           |
|---------|-----------|
| 340.152 | C17H24O7  |
| 342.167 | C17H26O7  |
| 342.204 | C18H30O6  |
| 344.147 | C16H24O8  |
| 344.183 | C17H28O7  |
| 346.162 | C16H26O8  |
| 352.188 | C19H28O6  |
| 352.224 | C20H32O5  |
| 353.232 | C20H33O5  |
| 354.167 | C18H26O7  |
| 354.204 | C19H30O6  |
| 356.183 | C18H28O7  |
| 358.162 | C17H26O8  |
| 358.199 | C18H30O7  |
| 360.178 | C17H28O8  |
| 360.214 | C18H32O7  |
| 364.173 | C16H28O9  |
| 366.152 | C15H26O10 |
| 366.204 | C20H30O6  |
| 368.183 | C19H28O7  |
| 368.219 | C20H32O6  |
| 370.162 | C18H26O8  |
| 370.199 | C19H30O7  |
| 372.193 | C22H28O5  |
| 374.157 | C17H26O9  |
| 374.194 | C18H30O8  |
| 376.173 | C17H28O9  |
| 376.188 | C21H28O6  |
| 380.168 | C16H28O10 |
| 384.178 | C19H28O8  |
| 384.214 | C20H32O7  |
| 386.194 | C19H30O8  |
| 386.23  | C20H34O7  |
| 388.246 | C20H36O7  |

|         |           |
|---------|-----------|
| 398.194 | C20H30O8  |
| 398.23  | C21H34O7  |
| 400.173 | C19H28O9  |
| 400.209 | C20H32O8  |
| 402.167 | C22H26O7  |
| 402.225 | C20H34O8  |
| 414.188 | C20H30O9  |
| 416.204 | C20H32O9  |
| 430.183 | C20H30O10 |
| 432.163 | C19H28O11 |
| 432.199 | C20H32O10 |
| 462.137 | C19H26O13 |
| 462.173 | C20H30O12 |
| 592.148 | C20H32O20 |

**TABLE S3**

**Table S3 T-test results of the difference between dimer fractions at different RH in the presence and absence of AS seed**

|         |                    |                    |                    |                     |                     |                     |
|---------|--------------------|--------------------|--------------------|---------------------|---------------------|---------------------|
| AS seed | (3±1)%/<br>(28±2)% | (3±1)%/<br>(54±2)% | (3±1)%/<br>(84±3)% | (28±2)%/<br>(54±2)% | (28±2)%/<br>(84±3)% | (54±2)%/<br>(84±3)% |
| t       | 4.62               | 3.11               | 2.14               | -0.45               | -0.48               | -0.45               |
| P       | 0.00               | 0.00               | 0.04               | 0.66                | 0.64                | 0.66                |
| No seed | (<1)%/<br>(28±1)%  | (<1)%/<br>(58±2)%  | (<1)%/<br>(91±2)%  | (28±1)%/<br>(58±2)% | (28±1)%/<br>(91±2)% | (58±2)%/<br>(91±2)% |
| t       | 7.42               | 8.03               | 8.73               | 3.31                | 3.94                | 2.56                |
| P       | 0.00               | 0.00               | 0.00               | 0.00                | 0.00                | 0.01                |

**References:**

Seinfeld, J. H. and Pandis, S. N.: Atmospheric chemistry and physics : from air pollution to climate change (3rd Edn.), John Wiley & Sons, Inc., Hoboken, NJ, 2016.

Stanier, C. O., R. K. Pathak, and S. Pandis (2007), Measurements of the volatility of aerosols from alpha-pinene ozonolysis, *Environ. Sci. Technol.*, 41(8), 2756–2763.

Saleh, R., Donahue, N. M., and Robinson, A. L.: Time scales for gas-particle partitioning equilibration of secondary organic aerosol formed from alpha-pinene ozonolysis, *Environ. Sci. Technol.*, 47, 5588–5594.

Vaden, T. D., D. Imre, J. Beranek, M. Shrivastava, and A. Zelenyuk (2011), Evaporation kinetics and phase of laboratory and ambient secondary organic aerosol, *Proc. Natl. Acad. Sci. U. S. A.*, 108: 2190–2195,

Zhang, X., Schwantes, R. H., McVay, R. C., Lignell, H., Coggon, M. M., Flagan, R. C., and Seinfeld, J. H. (2015), Vapor wall deposition in Teflon chambers, *Atmos. Chem. Phys.*, 15, 4197–4214.
